# Supplementary material for: A structural basis for selection and cross-species reactivity of the semi-invariant NKT cell receptor in CD1d/glycolipid recognition
Source: PubMed Central journal article supplement — J Exp Med. 2006 Mar 20;203(3):661–73. doi: 10.1084/jem.20051777 (PMC2118261; doi:10.1084/jem.20051777), 2006-03-20
Supplement: jexpmed_jem.20051777_7.pdf [file jexpmed_jem.20051777_7.pdf]

Kjer-Nielsen et al. <http://www.jem.org/cgi/content/full/jem.20051777/DC1>**CDNA CLONING OF THE NKT $\alpha$  AND NKT $\beta$  CHAIN GENES**

A bulk human NKT cell line was generated by autologous stimulation of PBMCs with  $\alpha$ -GalCer. RNA was extracted with TRIzol (Invitrogen) and reverse transcribed using oligo-dT and Superscript II (Invitrogen). cDNA encoding the variable and a portion of the constant extracellular domains of the NKT $\alpha$  (TRAV10) and the NKT $\beta$  (TRBV25-1) chains was amplified by PCR using the oligonucleotides: 5'-cgccatatgaaaaccaagtggagcag-3' and 5'-gtacacggcaggatccgggttctggat-3'; and 5'-cgccatggaagctgacatctaccag-3' and 5'-ggtgtgggagatctctbcttctga-3', respectively, and subsequently cloned into pGEM Easy (Promega). Genes were verified by sequencing, before transfer as NdeI-BamHI or NdeI-BglII fragments into either of two pET30 expression vectors (Novagen), containing the sequences encoding the C $\alpha$  or C $\beta$  domains (1). Codons for residue Thr48 (C $\alpha$  constant domain) and residue Ser57 (C $\beta$  constant domain) were mutated to encode cysteine by QuikChange Site-Directed Mutagenesis (Invitrogen). The genes were thus predicted to encode the extracellular domains of NKT $\alpha$  and NKT $\beta$ , terminating immediately before the cysteines that normally form an interchain disulphide bond. Instead, interchain disulphide-bond linkage was mediated through the two introduced constant-domain cysteines. Genes encoding the mutated NKT15'98AAA100' and NKT15/LC13 (CDR3 $\beta$  swap)  $\beta$  chains were engineered by QuikChange Site-Directed Mutagenesis (Invitrogen).

**CLONING AND EXPRESSION OF CD1D**

Human CD1d cDNA was derived from peripheral blood mononuclear cell RNA extracted with TRIzol (Invitrogen), and reverse transcribed using oligo-dT and Superscript II (Invitrogen). cDNA encoding the three extracellular domains of human CD1d (encoding residues 1-275) was amplified by PCR using the oligonucleotides: 5'-tccccgggggtcccgcaaggcttttcccctcc-3' and 5'-cggggtaccttagcagtgatggtgatgatgcccggccagtagaggacgatgcc-3'. The codon for residue Cys10 was mutated to encode serine by QuikChange Site-Directed Mutagenesis (Invitrogen). Mouse CD1d cDNA was a gift from M. Kronenberg. Soluble mouse and human CD1d were co-expressed with  $\beta$  microglobulin ( $\beta$ 2M) from the same source using the pFastBac Dual expression vector and the BAC-TO-BAC baculovirus expression system (Invitrogen). The mCD1d protein was designed for downstream biotinylation through the incorporation of a BirA tag at the COOH terminus of the protein (2), whereas the hCD1d was biotinylated via an engineered free cysteine at the COOH terminus. Hexa-histidine-tagged protein was expressed in HIGH FIVE insect cells and harvested 3 d after infection. Secreted, recombinant protein was dialyzed extensively in either 10 mM Tris, pH 8, or PBS before purification using Ni-agarose beads (QIAGEN). The Ni-agarose beads were washed extensively in a buffer containing 10 mM tris pH 8, 20 mM imidazole and 0.3 M NaCl and prior to purification the dialysate containing the secreted CD1d was spiked with 20 mM imidazole. CD1d protein was bound to the Ni-agarose beads, washed, and eluted in a buffer containing 10 mM Tris, pH 8, 250 mM imidazole, 0.3 M NaCl.

**REFERENCES**

1. Kjer-Nielsen, L., C.S. Clements, A.G. Brooks, A.W. Purcell, J. McCluskey, and J. Rossjohn. 2002. The 1.5 Å crystal structure of a highly selected antiviral T cell receptor provides evidence for a structural basis of immunodominance. *Structure*. 10:1521-1532.
2. Chen, I., M. Howarth, W. Lin, and A.Y. Ting. 2005. Site-specific labeling of cell surface proteins with biophysical probes using biotin ligase. *Nat. Methods*. 2:99-104.
